# Supplementary material
Source: publisher figshare collection journal article supplement (https://sage.figshare.com/ndownloader/files/20098484)
Supplement: Supplementary file 1 [file 20098484]

List of the re-evaluated F344/N rat bone marrow slides previously diagnosed with reticulum cell hyperplasia

|  | Chemical | Dose group | Sex | Original Diagnosis | Modifier of Original Diagnosis | Diagnoses based on re-evaluation |
| --- | --- | --- | --- | --- | --- | --- |
|
| 1* | 1,2-Dihydro-2,2,4-trmethylquinoline | Treated | Female | RCH | Moderate | Cellularity increased, macrophage |
| 2 | 2,4-Dichlorophenol | Control | Female | RCH | Moderate | Histiocytic sarcoma |
| 3 | 2,4-Dichlorophenol | Control | Female | RCH | Mild | Normal |
| 4* | 4-Vinyl-1-cyclohexene diepoxide | Control | Female | RCH | Moderate | Cellularity increased, macrophage |
| 5 | 4-Vinyl-1-cyclohexene diepoxide | Control | Female | RCH | Marked | Cellularity increased, macrophage |
| 6 | 4-Vinyl-1-cyclohexene diepoxide | Treated | Female | RCH | Mild | Cellularity increased, macrophage |
| 7* | 4-Vinyl-1-cyclohexene diepoxide | Treated | Female | RCH | Moderate | Cellularity increased, macrophage |
| 8* | 5,5-Diphenylhydantoin | Control | Female | RCH | Marked | Histiocytic sarcoma |
| 9 | Acetonitrile | Control | Male | RCH | Marked | Increase myeloid cells |
| 10 | Acetonitrile | Control | Male | RCH | Marked | Increase myeloid cells |
| 11 | Acetonitrile | Treated | Female | RCH | Marked | Increase myeloid cells |
| 12 | Acetonitrile | Control | Female | RCH | Marked | Increase myeloid cells |
| 13 | Acetonitrile | Treated | Female | RCH | Marked | Normal |
| 14 | Acetonitrile | Treated | Female | RCH | Marked | Normal |
| 15 | Acetonitrile | Treated | Female | RCH | Marked | Increase myeloid cells |
| 16 | Acetonitrile | Treated | Female | RCH | Marked | Increase myeloid cells |
| 17 | Acetonitrile | Control | Male | RCH | Moderate | Normal |
| 18 | Benzaldehyde | Treated | Female | RCH | Moderate | Cellularity increased, macrophage |
| 19 | Benzaldehyde | Treated | Female | RCH | Mild | Cellularity increased, macrophage |
| 20 | Benzaldehyde | Treated | Female | RCH | Marked | Cellularity increased, macrophage |
| 21 | Benzaldehyde | Control | Female | RCH | Moderate | Histiocytic sarcoma |
| 22* | Butyl benzyl phthalate | Control | Male | RCH | Marked | Histiocytic sarcoma |
| 23* | Butyl benzyl phthalate | Treated | Female | RCH | Mild | Cellularity increased, macrophage |
| 24 | D-Carvone | Control | Female | RCH | Moderate | Histiocytic sarcoma |
| 25 | Decalin | Treated | Male | RCH | Moderate | Normal |
| 26* | Dibromoacetonitrile | Treated | Female | RCH | Moderate | Histiocytic sarcoma |
| 27* | Dichlorvos | Control | Female | RCH | Marked | Cellularity increased, macrophage |
| 28* | Dichlorvos | Treated | Female | RCH | Marked | Cellularity increased, macrophage |
| 29 | Dichlorvos | Treated | Female | RCH | Marked | Histiocytic sarcoma |
| 30 | Dichlorvos | Treated | Female | RCH | Marked | Cellularity increased, macrophage |
| 31 | Dichlorvos | Treated | Female | RCH | Mild | Cellularity increased, macrophage |
| 32 | Dichlorvos | Treated | Male | RCH | Marked | Cellularity increased, macrophage |
| 33 | Dichlorvos | Treated | Female | RCH | Mild | Cellularity increased, macrophage |
| 34* | Diethylamine | Control | Female | RCH | Moderate | Histiocytic sarcoma |
| 35 | Diethylamine | Control | Female | RCH | Marked | Histiocytic sarcoma |
| 36 | Diethylamine | Treated | Male | RCH | Moderate | Normal |
| 37 | Diethylamine | Treated | Female | RCH | Moderate | Normal |
| 38 | Diethylamine | Treated | Female | RCH | Marked | Increase myeloid cells |
| 39 | Dimethoxane | Treated | Male | RCH | Marked | Histiocytic sarcoma |
| 40 | Dimethoxane | Treated | Male | RCH | Mild | Cellularity increased, macrophage |
| 41 | Dimethoxane | Control | Female | RCH | Mild | Cellularity increased, macrophage |
| 42 | Dimethoxane | Treated | Female | RCH | Moderate | Cellularity increased, macrophage |
| 43 | Ethylene thiourea | Treated | Female | RCH | Mild | Cellularity increased, macrophage |
| 44* | Ethylene thiourea | Treated | Female | RCH | Marked | Histiocytic sarcoma |
| 45* | Ethylene thiourea | Treated | Female | RCH | Moderate | Histiocytic sarcoma |
| 46 | Hexachlorocyclopentadiene | Treated | Female | RCH | Marked | Normal |
| 47* | Isoeugenol | Treated | Female | RCH | Marked | Histiocytic sarcoma |
| 48* | Isoeugenol | Treated | Male | RCH | Moderate | Histiocytic sarcoma |
| 49 | Methyl isobutyl ketone | Treated | Male | RCH | Marked | Normal |
| 50 | N-Methylolacrylamide | Treated | Female | RCH | Moderate | Cellularity increased, macrophage |
| 51 | N-Methylolacrylamide | Treated | Female | RCH | Moderate | Histiocytic sarcoma |
| 52 | N-Methylolacrylamide | Control | Female | RCH | Mild | Cellularity increased, macrophage |
| 53 | N-Methylolacrylamide | Control | Female | RCH | Mild | Cellularity increased, macrophage |
| 54 | Nitrofurantoin | Control | Male | RCH | Moderate | Histiocytic sarcoma |
| 55 | Nitrofurantoin | Treated | Female | RCH | Mild | Cellularity increased, macrophage |
| 56* | Nitromethane | Treated | Female | RCH | Mild | Cellularity increased, macrophage |
| 57 | Nitromethane | Treated | Female | RCH | Mild | Cellularity increased, macrophage |
| 58* | O-benyl-P-chlorophenol | Treated | Female | RCH | Minimal | Cellularity increased, macrophage |
| 59* | O-nitroanisole | Control | Female | RCH | Mild | Cellularity increased, macrophage |
| 60 | Ochratoxin A | Treated | Female | RCH | Marked | Autolysis |
| 61 | Ochratoxin A | Treated | Female | RCH | Mild | Autolysis |
| 62 | Ozone | Treated | Female | RCH | Mild | Cellularity increased, macrophage |
| 63* | Ozone | Control | Female | RCH | Mild | Cellularity increased, macrophage |
| 64* | p-Chloroaniline hydrochloride | Treated | Female | RCH | Mild | Cellularity increased, macrophage |
| 65 | p-Chloroaniline hydrochloride | Treated | Female | RCH | Marked | Histiocytic sarcoma |
| 66 | p-Chloroaniline hydrochloride | Treated | Female | RCH | Marked | Histiocytic sarcoma |
| 67* | p-Chloroaniline hydrochloride | Treated | Female | RCH | Mild | Cellularity increased, macrophage |
| 68* | Pentachloroanisole | Treated | Male | RCH | Moderate | Cellularity increased, macrophage |
| 69 | Pentachloroanisole | Control | Female | RCH | Moderate | Cellularity increased, macrophage |
| 70 | Pentachloroanisole | Control | Male | RCH | Mild | Cellularity increased, macrophage |
| 71* | Polybrominated biphenyl mixture | Control | Male | RCH | Marked | Histiocytic sarcoma |
| 72 | Pyridine | Treated | Female | RCH | Moderate | Histiocytic sarcoma |
| 73 | Succinic anhydride | Treated | Female | RCH | Marked | Histiocytic sarcoma |
| 74 | Succinic anhydride | Control | Female | RCH | Mild | Cellularity increased, macrophage |
| 75* | Tetrafluoroethylene | Treated | Female | RCH | Mild | Cellularity increased, macrophage |
| 76 | Tetrahydrofuran | Control | Male | RCH | Mild | Normal |
| 77* | Tetrahydrofuran | Control | Female | RCH | Moderate | Histiocytic sarcoma |
| 78 | Tetralin | Control | Male | RCH | Moderate | Normal |
| 79 | Tetralin | Treated | Female | RCH | Moderate | Normal |
| 80 | Tetralin | Treated | Female | RCH | Marked | Normal |
| 81 | Tetralin | Treated | Male | RCH | Marked | Increase myeloid cells |
| 82 | Triamterene | Control | Female | RCH | Mild | Autolysis |
| 83 | Triamterene | Control | Female | RCH | Mild | Autolysis |

*Stained with ionized calcium binding adapter molecule 1 (Iba1); RCH = reticulum cell hyperplasia
